# Supplementary material for: Possible Loss of the Chloroplast Genome in the Parasitic Flowering Plant Rafflesia lagascae (Rafflesiaceae)
Source: PubMed Central journal article supplement — Mol Biol Evol. 2014 Jan 23;31(4):793–803. doi: 10.1093/molbev/msu051 (PMC3969568; doi:10.1093/molbev/msu051), 2014-01-23
Supplement: supp_msu051_Supplementary_Data_2.pdf [file supp_msu051_Supplementary_Data_2.pdf]

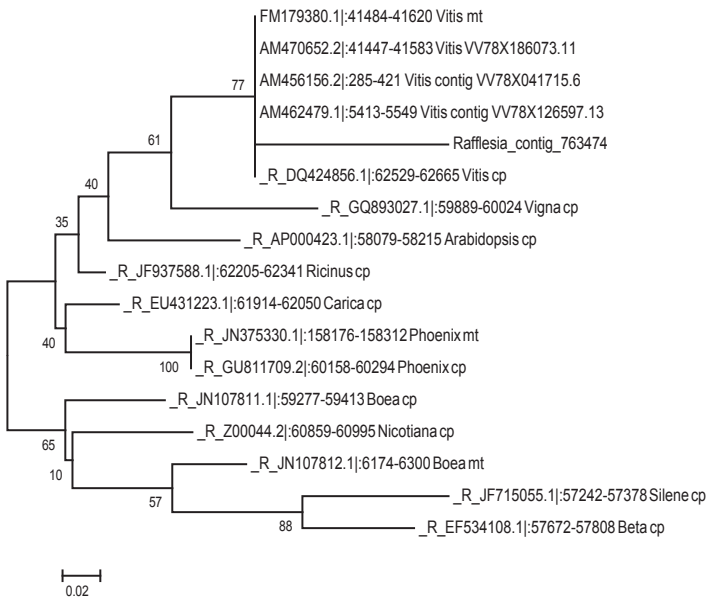

*accD*, contig 763474

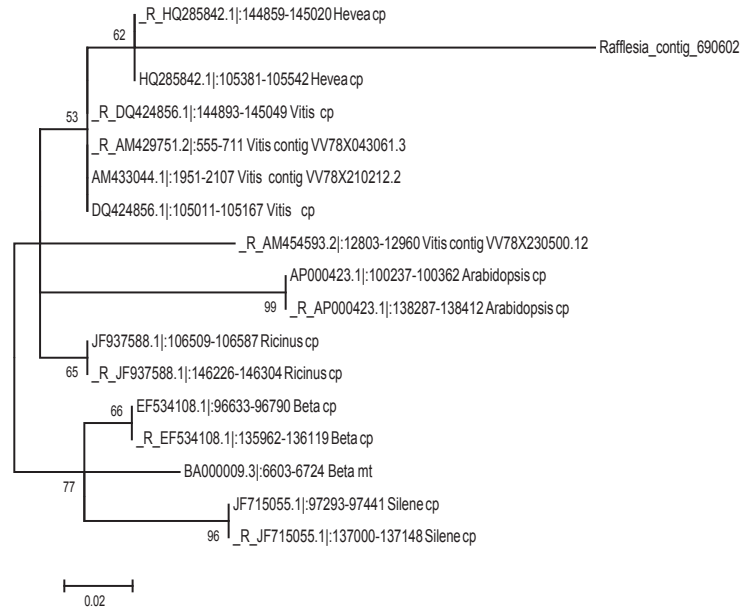

IR, contig 690602

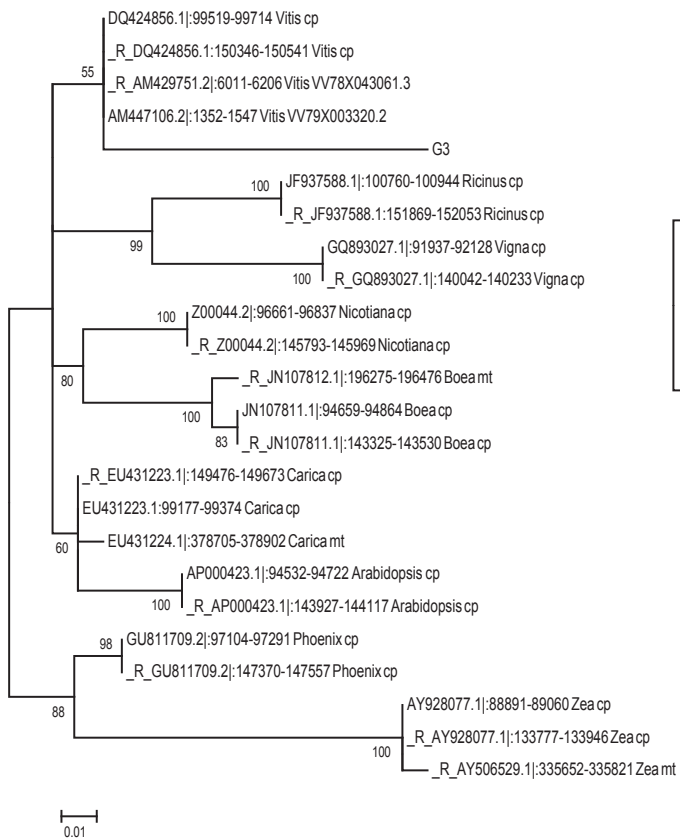

IR, G3

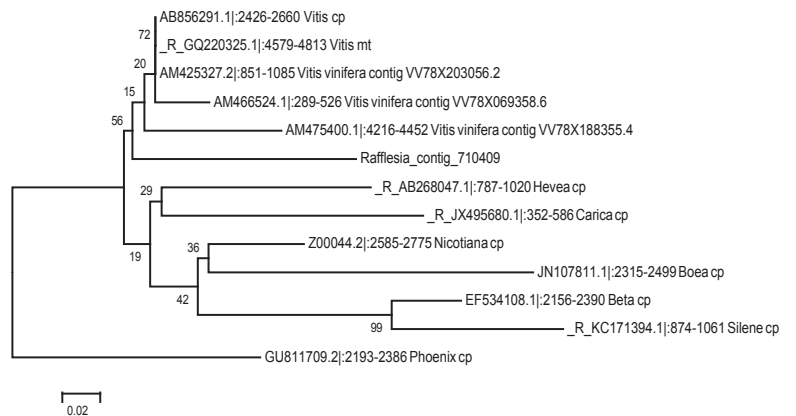

*matK*, contig 710409

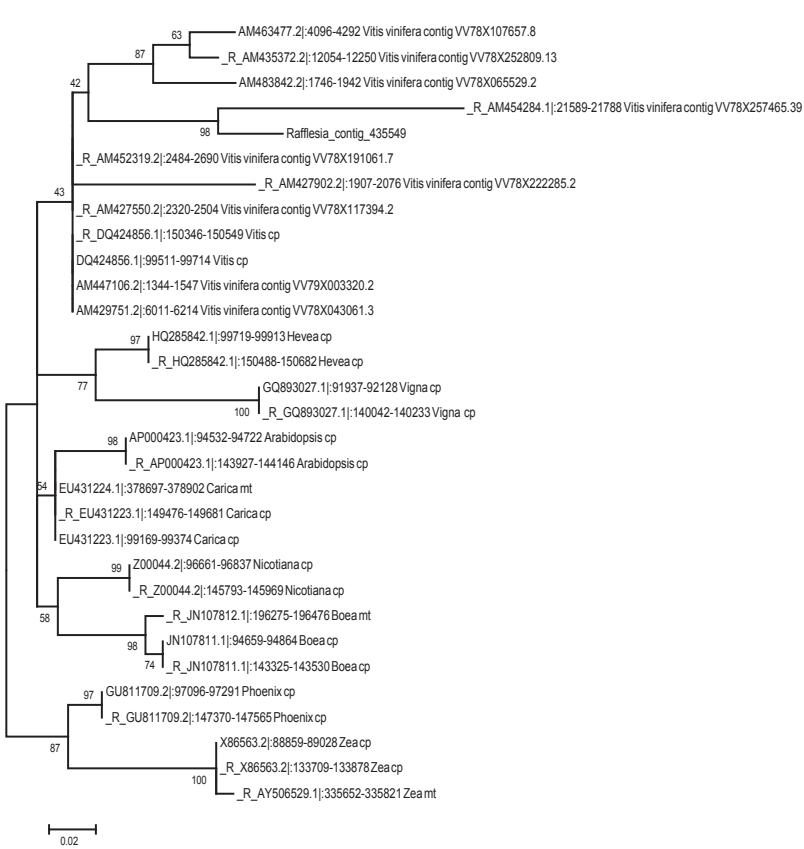

IR, contig 435549

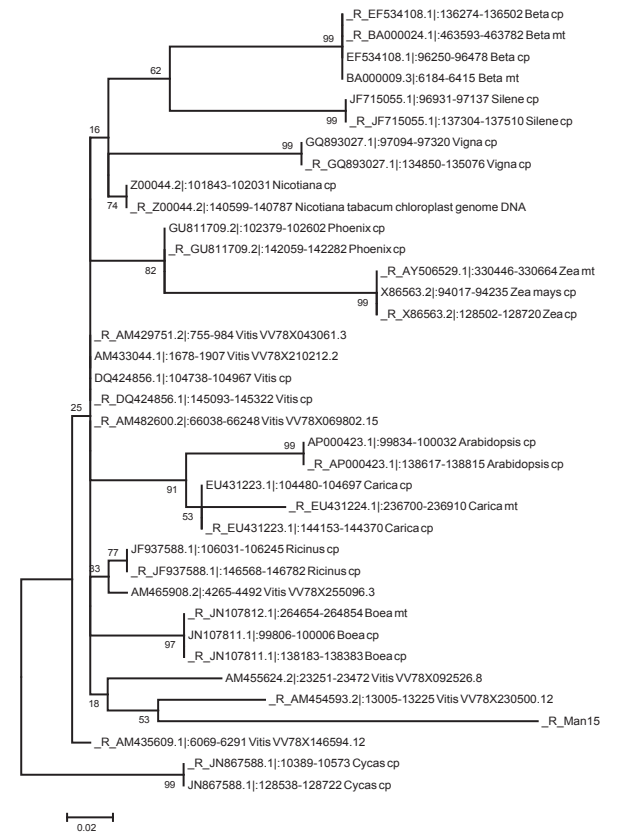

IR, G15

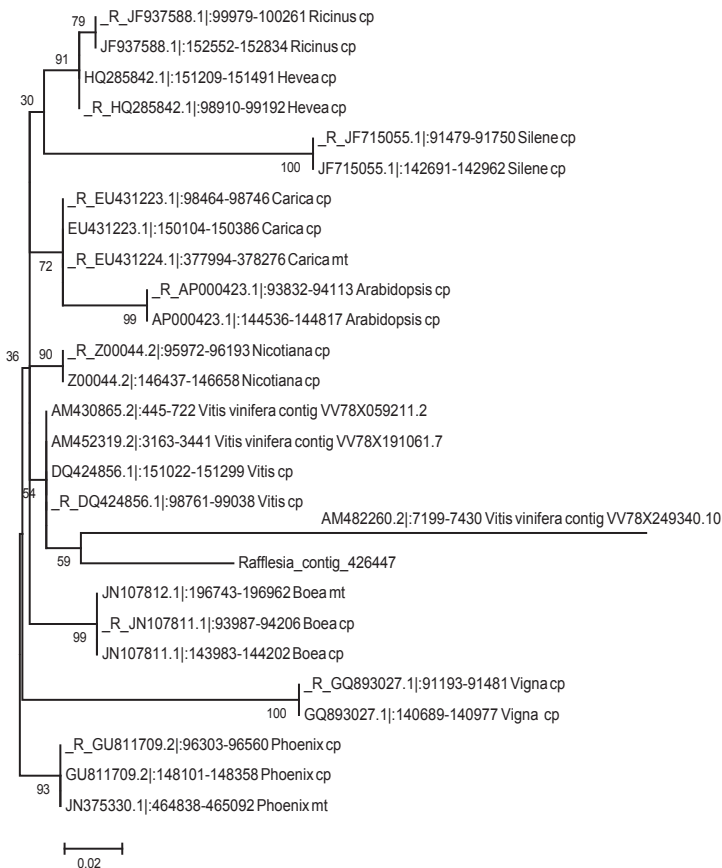

IR, contig 426447

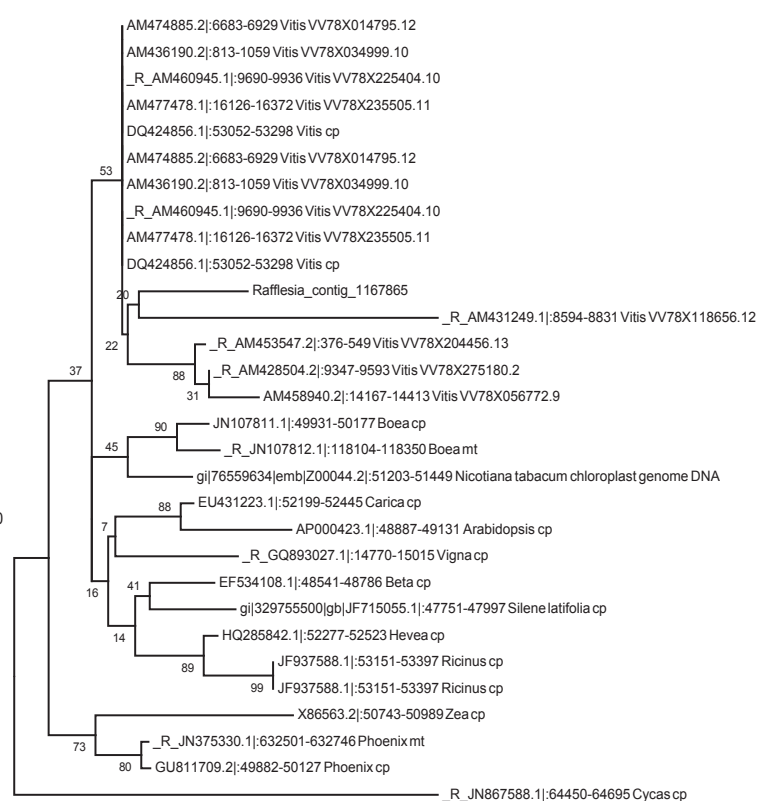

ndhJ, contig 1167865

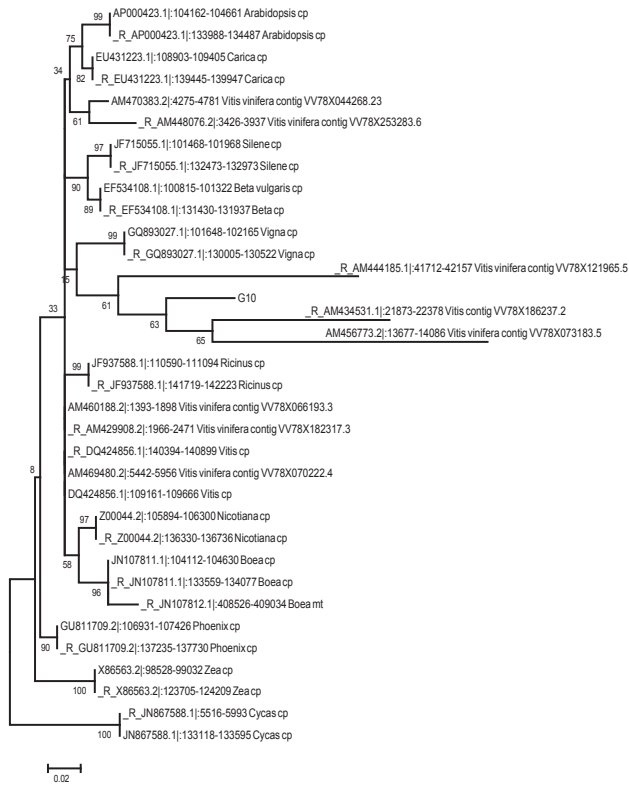

IR, G10

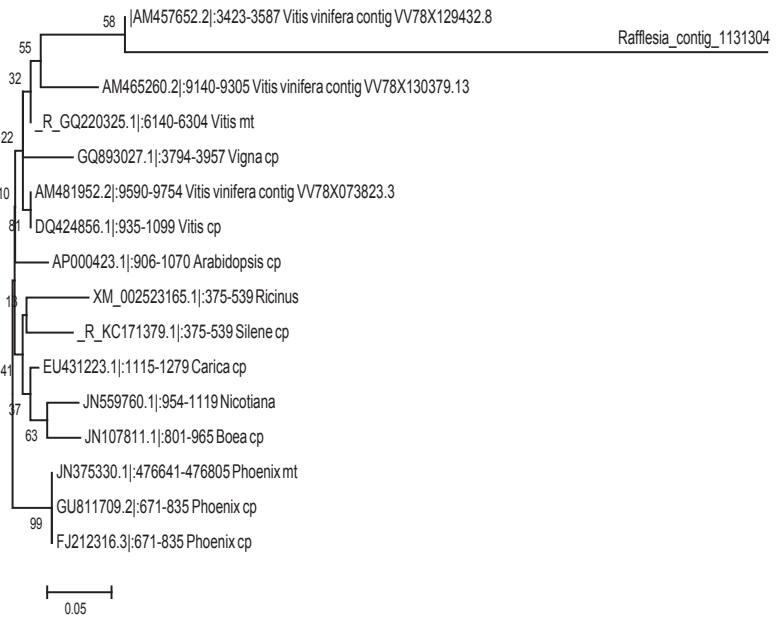

psbA, contig 1131304

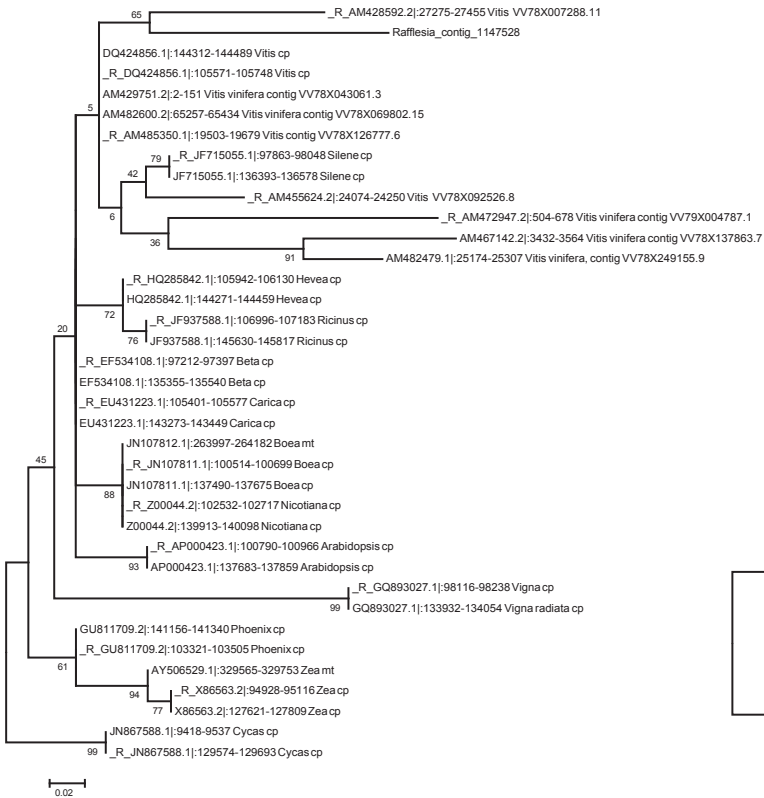

IR, contig 1147528

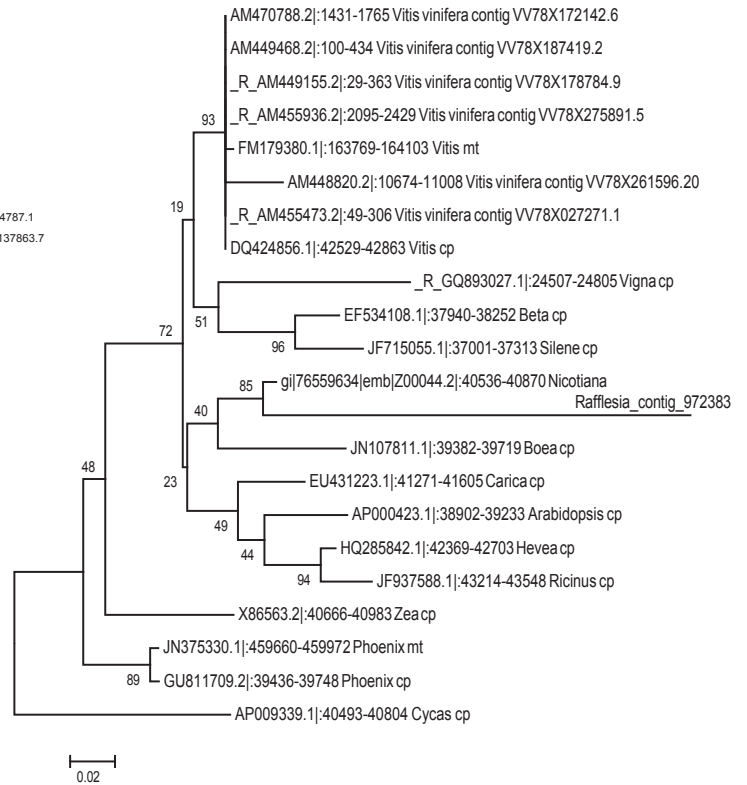

psaB, contig 972383

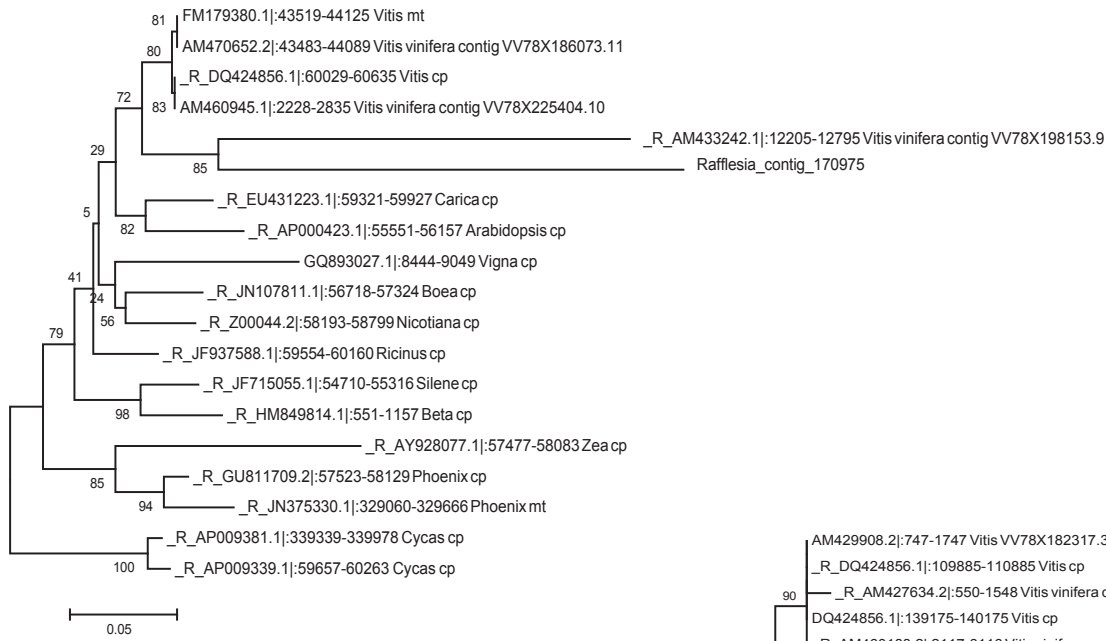

*rbcL2*, contig 170975

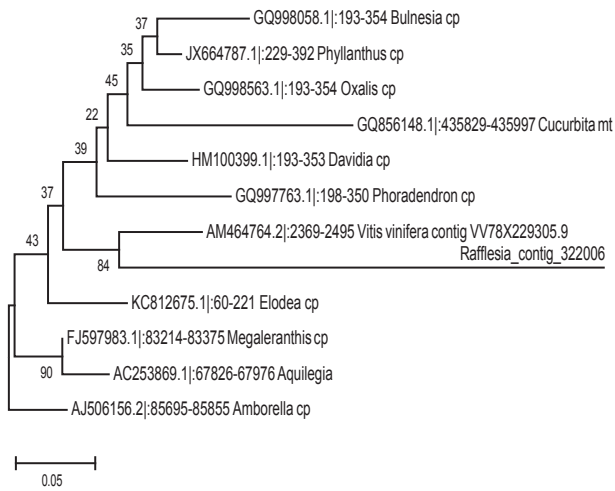

*rps11*, contig 322006

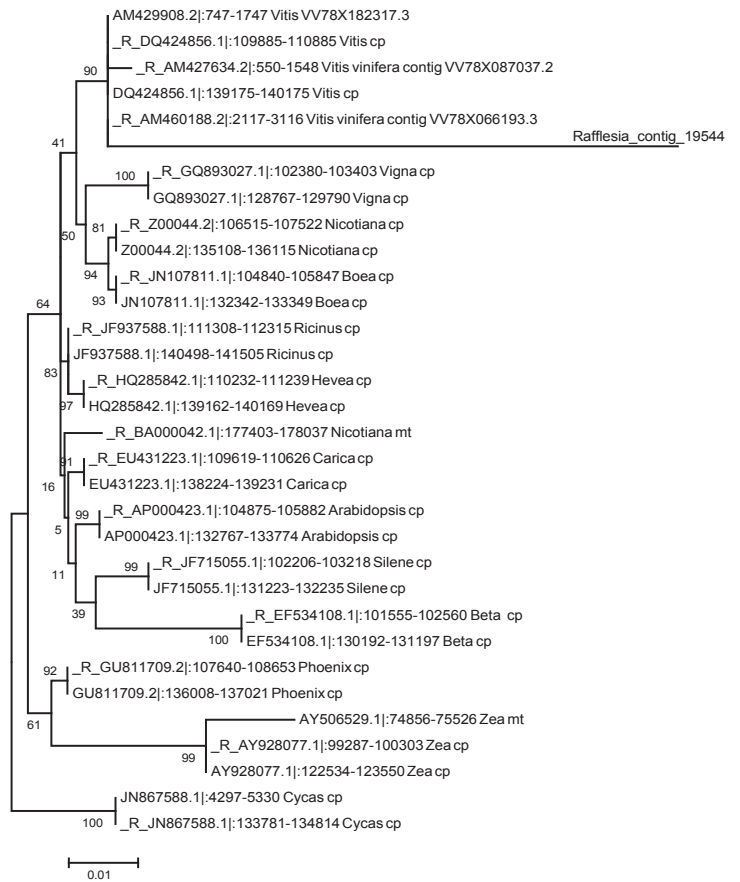

*rrn23*, contig 19544
